# Supplementary material for: Carbonic anhydrase inhibitor attenuates ischemia-reperfusion induced acute lung injury
Source: PLoS One. 2017 Jun 23;12(6):e0179822. doi: 10.1371/journal.pone.0179822 (PMC5482472; doi:10.1371/journal.pone.0179822)
Supplement: S3 File — The Kf1 at baseline was similar among all groups (p>0.05 as compared among the sham, IR and IR with AZA groups). The Kf2 in the IR group was significantly higher than that in the sham group (p<0.05 as compared between the IR and sham groups). AZA significantly attenuated IR-induced microvascular hyper-permeability (p<0.05 as compared with the IR group). Changes of micro-vascular permeability were significantly higher in the IR group (p<0.05 as compared with the sham group) and were attenuated by administration of AZA (p<0.05 as compared between the IR and IR with AZA groups). (XLSX) [file pone.0179822.s003.xlsx]

## Sheet: Kf
Group	Group	KF1	KF2	KF% change
1	ctrl	0.10288	0.11888	15.5521
1	ctrl	0.164862	0.18318	11.1111
1	ctrl	0.176314	0.193105	9.52381
1	ctrl	0.129797	0.136511	5.17241
1	ctrl	0.120918	0.120918	-1.1477e-14
1	ctrl	0.0936878	0.11711	25
2	Ctrl-A200	0.178579	0.19222	7.63864
2	Ctrl-A200	0.195365	0.195365	1.27863e-13
2	Ctrl-A200	0.170177	0.190177	11.7524
2	Ctrl-A200	0.181951	0.181951	0
2	Ctrl-A200	0.0926419	0.108082	16.6667
2	Ctrl-A200	0.0957151	0.180619	193.182
3	IR	0.18668	0.54169	190.17
3	IR	0.10755	0.30831	186.667
3	IR	0.1213	0.55111	354.336
3	IR	0.11323	0.46624	311.764
3	IR	0.177673	0.473959	166.759
3	IR	0.126003	0.657919	422.146
4	IR-A100	0.0933511	0.336064	260
4	IR-A100	0.206762	0.531003	156.818
4	IR-A100	0.0814461	0.388067	376.471
4	IR-A100	0.21556	0.439742	104
4	IR-A100	0.1638	0.507781	210
4	IR-A100	0.0953243	0.22965	140.915
5	IR-A200	0.136614	0.155523	13.8418
5	IR-A200	0.211039	0.245448	16.3043
5	IR-A200	0.135295	0.279046	106.25
5	IR-A200	0.181092	0.295333	63.0849
5	IR-A200	0.124756	0.329713	164.286
5	IR-A200	0.166894	0.2731	63.6364
6	IR-A400	0.112997	0.143129	26.6667
6	IR-A400	0.185632	0.32795	76.6667
6	IR-A400	0.170142	0.265588	56.0976
6	IR-A400	0.12502	0.187529	50
6	IR-A400	0.155211	0.280857	80.9524
6	IR-A400	0.100297	0.277746	176.923
